# Supplementary material
Source: PubMed Central journal article supplement (PMC4920317)
Supplement: rspb20160488supp1.pdf [file rspb20160488supp1.pdf]

## SUPPLEMENTARY MATERIAL

### Co-evolution between positive reciprocity, punishment, and partner switching in repeated interactions

Matthias Wubs, Redouan Bshary, Laurent Lehmann

#### 1 SM-I Strategy set

2 In table S1 the move-wise strategies for each move of the stage game are listed, while table S2 lists  
3 the main classes of strategies.

4 In table S3 the full set of strategies is given. In the “Strategies” section of the main text the  
5 coding of the strategies is explained. Although the setup of our model allows for a great number  
6 of strategies, we have reduced the strategy space by removing phenotypically indistinguishable  
7 strategies (see also main text section “Removing phenotypically indistinguishable strategies”). For  
8 example, if the strategy specifies to always leave in move 2, regardless of the partner’s action, it  
9 can never punish the partner, since the pair will be broken up and thus the actions specified for  
10 this move (punish or not punish) will never be played. Some strategies are therefore phenotypically  
11 indistinguishable in our model, and per set of phenotypically indistinguishable strategies only one  
12 strategy was used in the strategy space.

13 An X in a move-wise strategy in table S3 is a placeholder for a conditional action that is not  
14 played at any point during the game (C or D in move 1; P or N in move 3). Two strategies that  
15 are otherwise similar, but differing in this action would therefore never act differently (i.e., they  
16 are phenotypically indistinguishable). Only one of these two strategies is included in the strategy  
17 space. This can occur in two situations. First, if an individual leaves after the partner cooperates  
18 (or defects), then it cannot also punish or conditionally cooperate/defect in the following round  
19 since the pair is broken up, and thus an X is shown in place of the conditional action in both  
20 the move-wise strategy for move 1 and 3. Second, we assumed that a punishing act could not be  
21 followed by a conditional action in move 1 of the following round, and thus the action P in the  
22 move-wise strategy for move 3 is always combined with an X in the move-wise strategy for move  
23 1.

## 24 SM-II Sensitivity analysis

### 25 SM-II.1 Parameter exploration in a well-mixed population

26 To test the robustness of our main result (the  $\mathcal{S}_c$  class dominates for high  $T$ ), we explored the  
 27 parameter space more thoroughly than presented in the main text. The exploration was done as  
 28 follows. The parameters  $B_h$  and  $D_p$  were set either to 2, 2.5, or 3, the parameters  $C_h$  and  $C_p$  were  
 29 set either to 0.5, 1, or 1.5, and the cost of leaving ( $C_l$ ) was set either to 0, 1, or 2. For each possible  
 30 combination of these parameters we ran simulations with the number of rounds  $T$  ranging from 1  
 31 to 100.

32 In Fig. S1 the results for four combinations of parameters are shown. If the  $B_h/C_h$  ratio is  
 33 low ( $B_h/C_h = 2/1.5$ , panel a), we find that a higher number of rounds is required to reach high  
 34 levels of cooperation compared to the baseline case (*cf.* main text Fig. 2a). Here, the  $\mathcal{S}_c$  class is  
 35 the dominant class of cooperative strategies. If the  $B_h/C_h$  ratio is high ( $B_h/C_h = 3/0.5$ , panel  
 36 b), only a few number of rounds is required for high levels of cooperation. The  $\mathcal{S}_c$  dominates here  
 37 for  $T \geq 3$ . If there is no cost of leaving ( $C_l = 0$ , panel c), the  $\mathcal{S}_c$  class is always the dominant  
 38 cooperative class of strategies. If punishment is very effective in terms of payoff, i.e., the  $D_p/C_p$   
 39 ratio is high ( $D_p/C_p = 3/0.5$ , panel d), the  $\mathcal{P}_c$  class dominates for a larger range of  $T$ , compared  
 40 to our baseline case (main text). However, for  $T > 40$  the  $\mathcal{S}_c$  class is again often found to be  
 41 dominant.

42 In short, for any parameter combination we find that, all else being equal, the relative compet-  
 43 itiveness of the  $\mathcal{S}_c$  class increases with increasing number of rounds.

#### 44 SM-II.1.1 Dynamic cost of leaving

45 In this section we investigate additional parameter values for  $a$  and  $k$  when using eq. 1 from the  
 46 main text to calculate the cost of leaving. The results are plotted in Fig. S2. Again we find that,  
 47 although the exact number of rounds where the  $\mathcal{S}_c$  class becomes dominant depends both on  $a$   
 48 and  $k$ , the  $\mathcal{S}_c$  class will always dominate for high  $T$ . This suggests that the  $\mathcal{S}_c$  class can evolve  
 49 irrespective of the underlying cost function.

#### 50 SM-II.1.2 Large $T$

51 To check to what extent the  $\mathcal{S}_c$  class dominates for large  $T$ , we ran simulations with  $T$  up to 1000,  
 52 while otherwise using our baseline set of parameters. We find that, although the  $\mathcal{S}_c$  class is by  
 53 far the most prevalent, other classes of cooperative strategies are maintained above frequencies

54 higher than what would be expected from the mutation rate alone (Fig. S3). This results from  
 55 the fact that the classes of cooperative strategies are nearly neutral in a population consisting of  
 56 mainly those classes ( $\mathcal{C}_c$ ,  $\mathcal{R}_c$ ,  $\mathcal{S}_c$ , and  $\mathcal{P}_c$ ), since these strategies will gain exactly the same payoff  
 57 when paired with one another. Therefore, through genetic drift the different cooperative strategies  
 58 may invade one another. However, uncooperative individuals will continue to enter the population  
 59 via mutation. When paired with uncooperative individuals the cooperative strategies will respond  
 60 differently, and thus gain different payoffs. Here, strategies of the  $\mathcal{C}_c$  class will then be strongly  
 61 selected against, but also strategies of the  $\mathcal{R}_c$  and  $\mathcal{P}_c$  class gain less payoff on average than those  
 62 of the  $\mathcal{S}_c$  class. Thus, through a mutation-selection-drift balance this polymorphism is maintained  
 63 in the population.

## 64 **SM-II.2 Parameter exploration in a group-structured population**

65 In this section we present additional results for the group-structured case.

### 66 **SM-II.2.1 Group-structure with small $T$**

67 In this section, we tested if the  $\mathcal{P}_c$  class is also relatively more favoured by selection in a structured  
 68 population if  $T$  is small. For  $T = 4$  in the well-mixed case the  $\mathcal{R}_c$  class dominates the population  
 69 (Fig. 2a). Using the same parameters as in the well-mixed case (except  $T = 4, d = 250$ , varying  
 70  $n$ ), we find again that the  $\mathcal{P}_c$  class is relatively more favoured by selection (Fig. S4a). Only in very  
 71 large groups the  $\mathcal{R}_c$  class outcompetes the  $\mathcal{P}_c$  class ( $n \geq 350$ ).

72 Interestingly, reducing  $D_p$  (the payoff reduction of being punished) did not affect the frequency  
 73 of the  $\mathcal{P}_c$  class, but instead negatively affected the frequency of the  $\mathcal{R}_c$  class ( $D_p = 1.2$ , Fig. S4b).  
 74 This was due to  $\mathcal{P}_c$  strategies having less impact on various defector strategies, which consequently  
 75 increased in frequency, which in turn negatively affected the  $\mathcal{R}_c$  class, but not the  $\mathcal{P}_c$  class. How-  
 76 ever, when increasing the cost of punishment ( $C_p$ ) the  $\mathcal{P}_c$  class disappeared from the population  
 77 and the  $\mathcal{R}_c$  class dominated for all but the smallest groups ( $C_p = 2, n \geq 16$ , Fig. S4c). This  
 78 discrepancy with  $D_p$  is due to  $C_p$  affecting the payoff of the  $\mathcal{P}_c$  class directly, while changing  $D_p$   
 79 affects recipients of punishment instead.

### 80 **SM-II.2.2 Further parameter exploration**

81 In this section we present results from a larger parameter space for the group-structured population.

82 First, we determined the minimum group size where the  $\mathcal{S}_c$  class dominates in conditions where  
 83 the  $\mathcal{P}_c$  is not dominant. To achieve this we used the same parameters as in Fig. 3c from the

84 main text with  $z = 3$ . Using these parameters we find that the  $\mathcal{P}_c$  class no longer dominates, and  
 85 instead the “rest” class and the  $\mathcal{R}_c$  class dominate in small groups (Fig. S5a). The  $\mathcal{S}_c$  class is  
 86 now dominant in the population for  $n \geq 20$  (compared to  $n \geq 32$  for  $z = 5$  in Fig. 3c in the main  
 87 text). Thus, even in unfavourable conditions for the  $\mathcal{P}_c$  class, the  $\mathcal{S}_c$  class does not dominate in  
 88 populations where interactions occur in small groups.

89 In Fig. S5b we use the same parameters as in panel a, but with  $C_1 = 1, T = 7$  in order to  
 90 determine if the  $\mathcal{S}_c$  class can dominate in a group-structured population when  $T$  is low. However,  
 91 we find here, similarly to our well-mixed population (Fig. 2a main text), that if  $T$  is low the  $\mathcal{S}_c$   
 92 class is outcompeted by the  $\mathcal{P}_c$  and  $\mathcal{R}_c$  classes for group size smaller than 120, and by the  $\mathcal{D}_c$  class  
 93 in larger groups. This confirms that the  $\mathcal{S}_c$  class needs a critical number of rounds in order to be  
 94 favoured by selection over the other classes.

95 In Fig. S5c we use the same parameters as Fig. 4b from the main text, with  $D_p = 1$ . This  
 96 shows that, although reducing  $D_p$  initially affects only the frequency of the  $\mathcal{S}_c$  and  $\mathcal{R}_c$  classes  
 97 (main text), if  $D_p$  is too low then the  $\mathcal{P}_c$  disappears completely from the population and the  $\mathcal{D}_c$   
 98 class is dominant for all group sizes.

99 In Fig. S5d we use the same parameters as in Fig. 4c from the main text, but with  $T = 7$ . In the  
 100 well-mixed population we have found that a higher number of rounds generally favours the  $\mathcal{P}_c$  class  
 101 over the  $\mathcal{R}_c$  class. Similarly, in Fig. 4c (main text) we find the  $\mathcal{R}_c$  class dominates if punishment  
 102 is costly to the punisher ( $C_p = 2$ ). However, if the number of rounds is increased, then we find  
 103 that the  $\mathcal{P}_c$  is dominant for group size  $n \leq 60$ . This confirms that also in the a group-structured  
 104 population, all else being equal, a higher number of rounds increases the relative competitiveness  
 105 of the  $\mathcal{P}_c$  class over the  $\mathcal{R}_c$  class.

### 106 **SM-III Co-evolution of the $\mathcal{P}_c$ class and response to punish-** 107 **ment**

108 In this section we show that the response to punishment by altering behaviour ( $x_4 = A$ ) co-evolves  
 109 with the  $\mathcal{P}_c$  class. To demonstrate this we used the same data as our baseline case (main text  
 110 Fig. 2a), but pooled the time average frequency of all strategies into three groups, based on their  
 111 response to punishment (ignore, alter, or leave) (Fig. S6). The frequency of each group is plotted  
 112 together with the frequency of the  $\mathcal{P}_c$  class. The results show that if  $\mathcal{P}_c$  strategies are frequent,  
 113 then strategies that alter behaviour after punishment ( $x_4 = A$ ) are also selected for.

Table S 1: The sets of move-wise strategies for each move of the stage game. The coding of strategies is explained in the “Strategies” section.

|                |                                          |
|----------------|------------------------------------------|
| <b>Move 1:</b> | {CCC, CCD, CDC, CDD, DCC, DCD, DDC, DDD} |
| <b>Move 2:</b> | {LL, SS, LS, SL}                         |
| <b>Move 3:</b> | {PP, NN, PN, NP}                         |
| <b>Move 4:</b> | {I, A, L}                                |

Table S 2: Main classes of strategies.

| <b>Name</b>                                 | Move 1 | Move 2 | Move 3 | Move 4    |
|---------------------------------------------|--------|--------|--------|-----------|
| <i>Always cooperate</i> $\mathcal{C}_c$     | CCC    | SS     | NN     | {I, A, L} |
| <i>Positive reciprocity</i> $\mathcal{R}_c$ | CCD    | SS     | NN     | {I, A, L} |
| <i>Partner switching</i> $\mathcal{S}_c$    | CCC    | SL     | NN     | {I, A, L} |
| <i>Punishment</i> $\mathcal{P}_c$           | CCC    | SS     | NP     | {I, A, L} |
| <i>Always defect</i> $\mathcal{D}_c$        | DDD    | SS     | NN     | {I, A, L} |

Table S 3: Full set of strategies used in all simulations. The coding is explained in the main text.

| Strategy | Move 1 | Move 2 | Move 3 | Move 4 | Strategy | Move 1 | Move 2 | Move 3 | Move 4 |
|----------|--------|--------|--------|--------|----------|--------|--------|--------|--------|
| 1        | CCC    | SS     | NN     | I      | 47       | DCC    | SS     | NN     | I      |
| 2        | CCC    | SS     | NN     | A      | 48       | DCC    | SS     | NN     | A      |
| 3        | CCC    | SS     | NN     | L      | 49       | DCC    | SS     | NN     | L      |
| 4        | CCD    | SS     | NN     | I      | 50       | DCD    | SS     | NN     | I      |
| 5        | CCD    | SS     | NN     | A      | 51       | DCD    | SS     | NN     | A      |
| 6        | CCD    | SS     | NN     | L      | 52       | DCD    | SS     | NN     | L      |
| 7        | CCX    | SL     | NX     | I      | 53       | DCX    | SL     | NX     | I      |
| 8        | CCX    | SL     | NX     | A      | 54       | DCX    | SL     | NX     | A      |
| 9        | CCX    | SL     | NX     | L      | 55       | DCX    | SL     | NX     | L      |
| 10       | CCX    | SS     | NP     | I      | 56       | DCX    | SS     | NP     | I      |
| 11       | CCX    | SS     | NP     | A      | 57       | DCX    | SS     | NP     | A      |
| 12       | CCX    | SS     | NP     | L      | 58       | DCX    | SS     | NP     | L      |
| 13       | CDC    | SS     | NN     | I      | 59       | DDC    | SS     | NN     | I      |
| 14       | CDC    | SS     | NN     | A      | 60       | DDC    | SS     | NN     | A      |
| 15       | CDC    | SS     | NN     | L      | 61       | DDC    | SS     | NN     | L      |
| 16       | CDD    | SS     | NN     | I      | 62       | DDD    | SS     | NN     | I      |
| 17       | CDD    | SS     | NN     | A      | 63       | DDD    | SS     | NN     | A      |
| 18       | CDD    | SS     | NN     | L      | 64       | DDD    | SS     | NN     | L      |
| 19       | CDX    | SL     | NX     | I      | 65       | DDX    | SL     | NX     | I      |
| 20       | CDX    | SL     | NX     | A      | 66       | DDX    | SL     | NX     | A      |
| 21       | CDX    | SL     | NX     | L      | 67       | DDX    | SL     | NX     | L      |
| 22       | CDX    | SS     | NP     | I      | 68       | DDX    | SS     | NP     | I      |
| 23       | CDX    | SS     | NP     | A      | 69       | DDX    | SS     | NP     | A      |
| 24       | CDX    | SS     | NP     | L      | 70       | DDX    | SS     | NP     | L      |
| 25       | CXC    | LS     | XN     | I      | 71       | DXC    | LS     | XN     | I      |
| 26       | CXC    | LS     | XN     | A      | 72       | DXC    | LS     | XN     | A      |
| 27       | CXC    | LS     | XN     | L      | 73       | DXC    | LS     | XN     | L      |
| 28       | CXD    | LS     | XN     | I      | 74       | DXD    | LS     | XN     | I      |
| 29       | CXD    | LS     | XN     | A      | 75       | DXD    | LS     | XN     | A      |
| 30       | CXD    | LS     | XN     | L      | 76       | DXD    | LS     | XN     | L      |
| 31       | CXX    | LL     | XX     | I      | 77       | DXX    | LL     | XX     | I      |
| 32       | CXX    | LS     | XP     | I      | 78       | DXX    | LS     | XP     | I      |
| 33       | CXX    | LS     | XP     | A      | 79       | DXX    | LS     | XP     | A      |
| 34       | CXX    | LS     | XP     | L      | 80       | DXX    | LS     | XP     | L      |
| 35       | CXC    | SS     | PN     | I      | 81       | DXC    | SS     | PN     | I      |
| 36       | CXC    | SS     | PN     | A      | 82       | DXC    | SS     | PN     | A      |
| 37       | CXC    | SS     | PN     | L      | 83       | DXC    | SS     | PN     | L      |
| 38       | CXD    | SS     | PN     | I      | 84       | DXD    | SS     | PN     | I      |
| 39       | CXD    | SS     | PN     | A      | 85       | DXD    | SS     | PN     | A      |
| 40       | CXD    | SS     | PN     | L      | 86       | DXD    | SS     | PN     | L      |
| 41       | CXX    | SL     | PX     | I      | 87       | DXX    | SL     | PX     | I      |
| 42       | CXX    | SL     | PX     | A      | 88       | DXX    | SL     | PX     | A      |
| 43       | CXX    | SL     | PX     | L      | 89       | DXX    | SL     | PX     | L      |
| 44       | CXX    | SS     | PP     | I      | 90       | DXX    | SS     | PP     | I      |
| 45       | CXX    | SS     | PP     | A      | 91       | DXX    | SS     | PP     | A      |
| 46       | CXX    | SS     | PP     | L      | 92       | DXX    | SS     | PP     | L      |

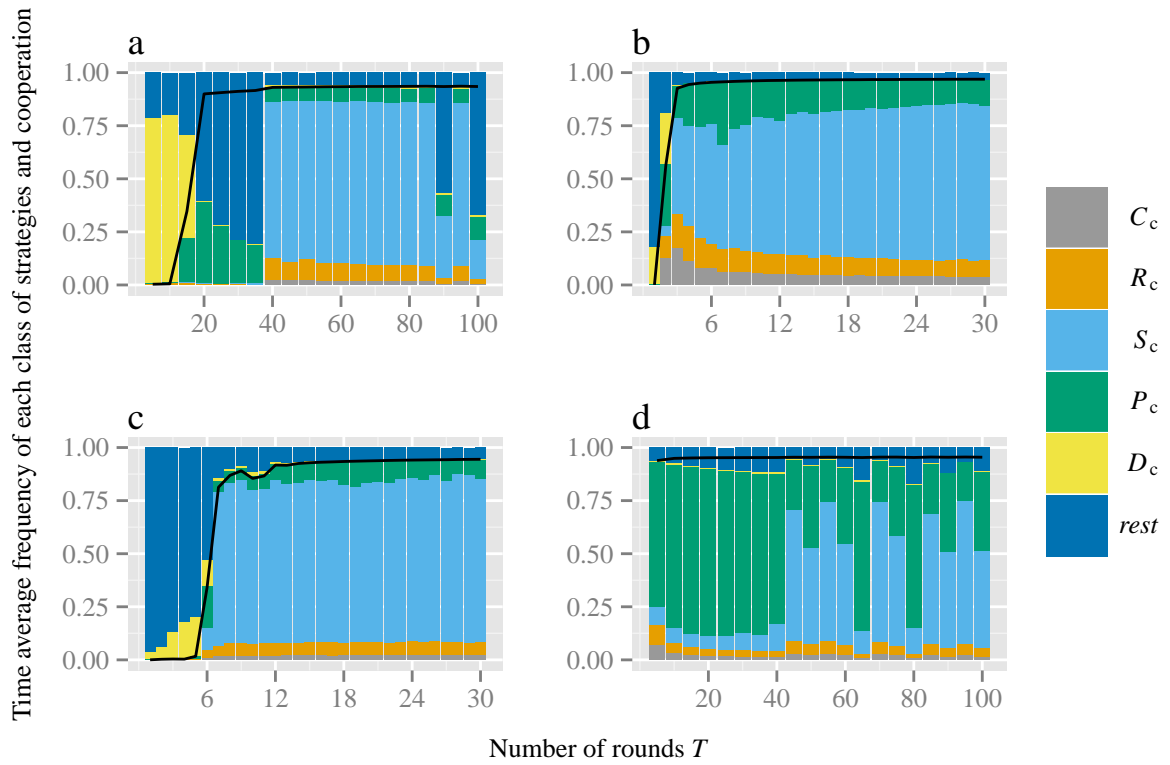

Figure S 1: Time average frequency (over  $10^6$  generations) of the frequency of cooperation (black line) and the six classes of strategies ( $\mathcal{R}_c$ ,  $\mathcal{S}_c$ ,  $\mathcal{P}_c$ ,  $\mathcal{C}_c$ ,  $\mathcal{D}_c$ , and “rest”) plotted as a function of the number of rounds  $T$  of the repeated game. Parameter values:  $B_h = 2, C_h = 1, D_p = 2, C_p = 1, C_1 = 1, z = T, \mu = 0.01, d = 1, n = 10000$ . Panel specific parameters:  $C_h = 1.5$  (panel a),  $B_h = 3, C_h = 0.5$  (panel b),  $C_1 = 0$  (panel c),  $D_p = 3, C_p = 0.5$  (panel d).

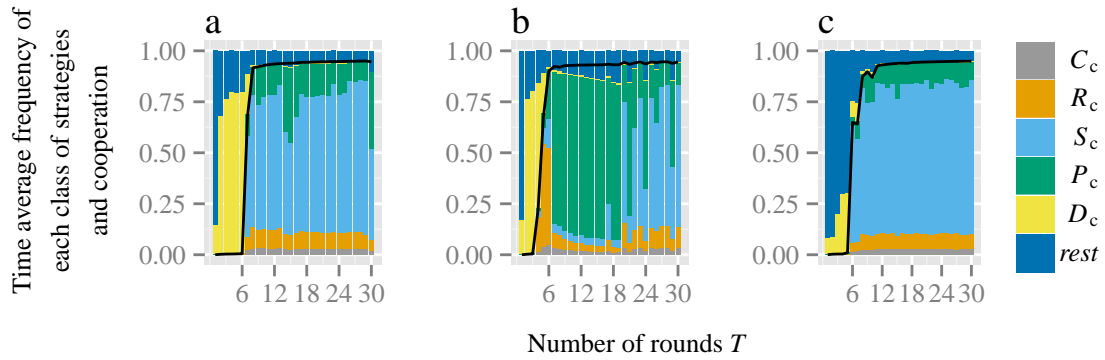

Figure S 2: Time average frequency (over  $10^6$  generations) of the frequency of cooperation (black line) and the six classes of strategies ( $\mathcal{R}_c$ ,  $\mathcal{S}_c$ ,  $\mathcal{P}_c$ ,  $\mathcal{C}_c$ ,  $\mathcal{D}_c$ , and “rest”) plotted as a function of the number of rounds  $T$  of the repeated game. Parameter values:  $B_h = 2, C_h = 1, D_p = 2, C_p = 1, z = T, \mu = 0.01, d = 1, n = 10000$ , using eq. 1 to calculate the cost of switching. Panel specific parameters:  $a = 50, k = 0.8$  (panel a),  $a = 100, k = 0.8$  (panel b),  $a = 100, k = 1$  (panel c).

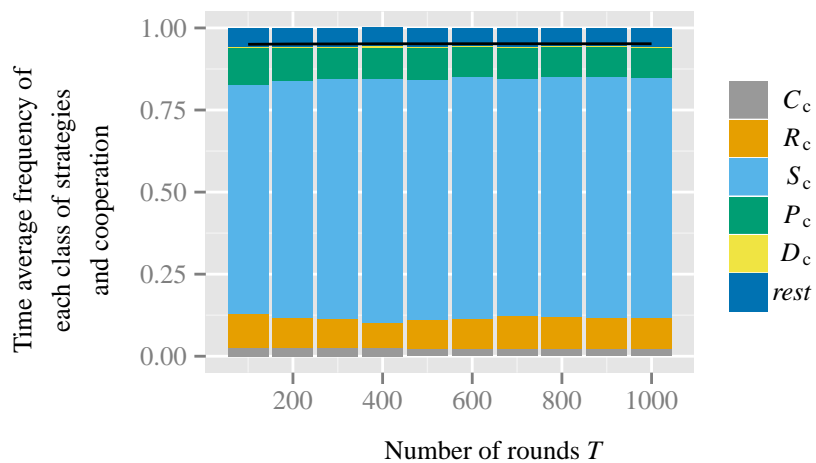

Figure S 3: Same as the baseline case (Fig. 2a, main text) but with a high number of rounds  $T$ .



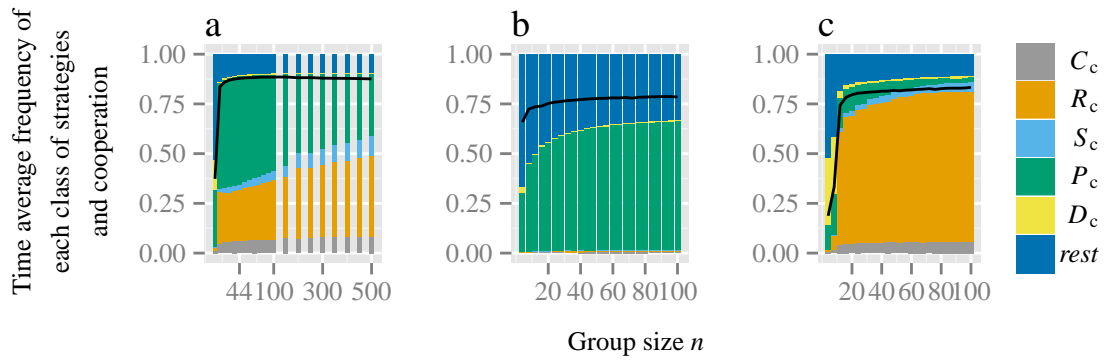

Figure S 4: Time average frequency (over  $10^6$  generations) of the frequency of cooperation (black line) and the six classes of strategies ( $\mathcal{R}_c$ ,  $\mathcal{S}_c$ ,  $\mathcal{P}_c$ ,  $\mathcal{C}_c$ ,  $\mathcal{D}_c$ , and “rest”) plotted as a function of group size  $n$ . Parameter values:  $B_h = 2, C_h = 1, C_1 = 1, T = 4, z = T, \mu = 0.01, d = 250$ . Panel specific parameters:  $D_p = 2, C_p = 1$  (panel a),  $D_p = 1.2, C_p = 1$  (panel b),  $D_p = 2, C_p = 2$  (panel c)

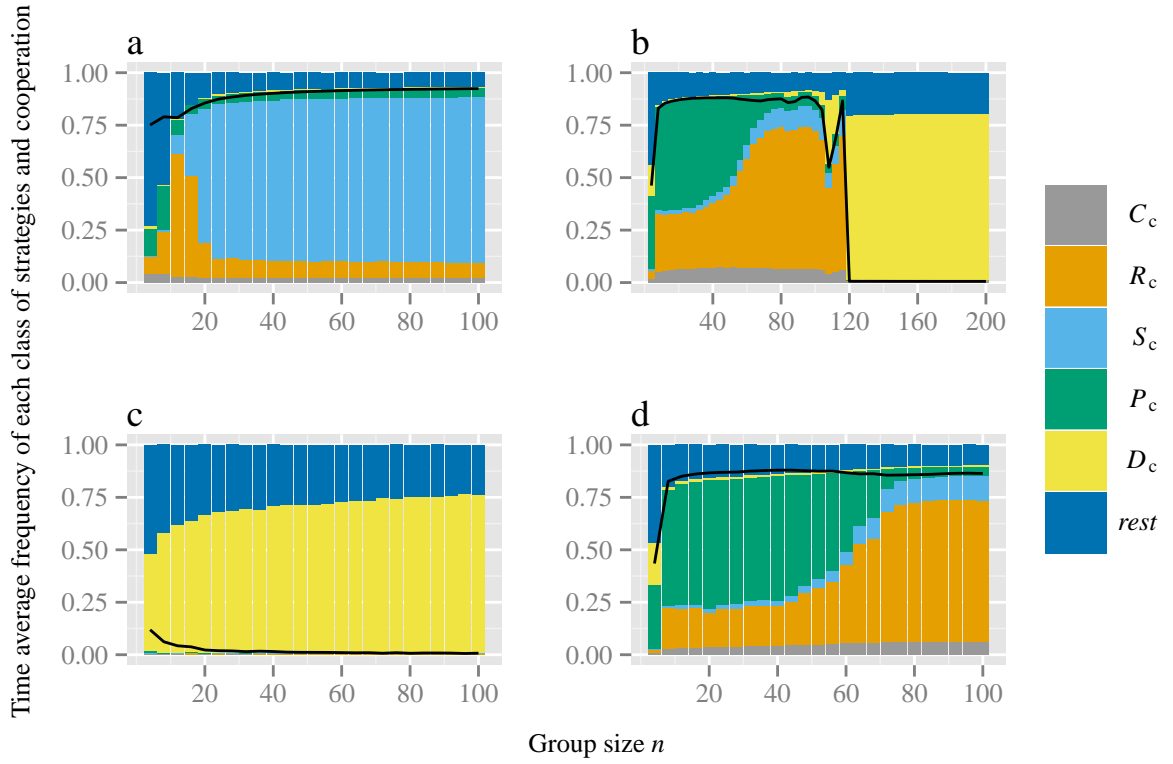

Figure S 5: Time average frequency (over  $10^6$  generations) of the frequency of cooperation (black line) and the six classes of strategies ( $\mathcal{R}_c$ ,  $\mathcal{S}_c$ ,  $\mathcal{P}_c$ ,  $\mathcal{C}_c$ ,  $\mathcal{D}_c$ , and “rest”) plotted as a function of group size  $n$ . Parameter values:  $B_h = 2$ ,  $C_h = 1$ ,  $\mu = 0.01$ ,  $d = 250$ . Panel specific parameters:  $D_p = 2$ ,  $C_p = 1$ ,  $C_1 = 0$ ,  $T = 30$ ,  $z = 3$  (panel a),  $D_p = 2$ ,  $C_p = 1$ ,  $C_1 = 1$ ,  $T = 7$ ,  $z = 3$  (panel b),  $D_p = 1$ ,  $C_p = 1$ ,  $C_1 = 1$ ,  $T = 4$ ,  $z = T$  (panel c),  $D_p = 2$ ,  $C_p = 2$ ,  $C_1 = 1$ ,  $T = 7$ ,  $z = T$  (panel d).

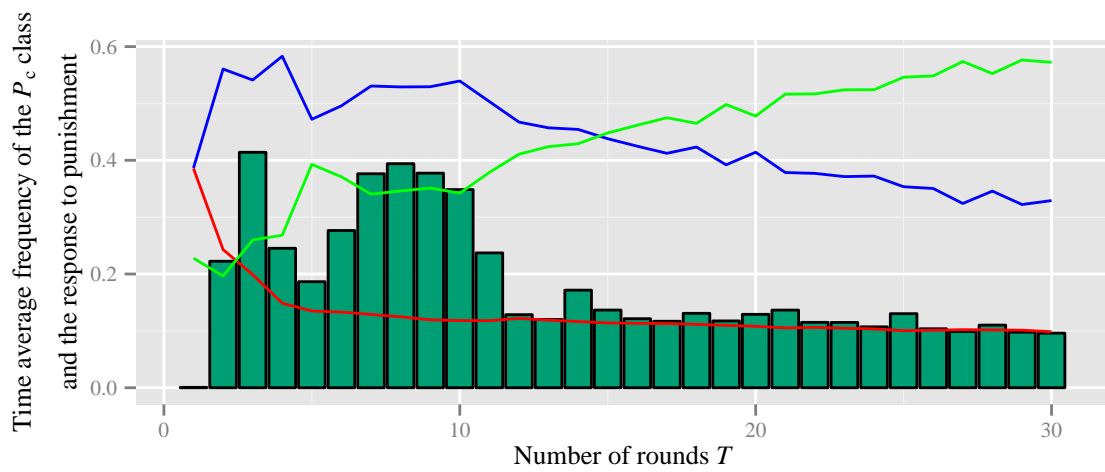

Figure S 6: Same as the baseline case (Fig. 2a, main text), but only showing the frequency of the  $\mathcal{P}_c$  class (bars), together with three sets of strategies based on the response to punishment ( $x_4$ ). The red line is the frequency of all strategies for which  $x_4 = I$ , the blue line for which  $x_4 = A$ , and the green line for which  $x_4 = L$ .
